# Supplementary material for: Production of nitrogen-doped carbon quantum dots with controllable emission wavelength, excellent sensing of Fe3+ in aqueous solution, and potential application for stealth quick response coding in the visible regime
Source: Royal Society of Chemistry journal article supplement (doi:10.1039/d1ra05106g), 2021-01-01
Supplement: d1ra05106g1.pdf [file d1ra05106g1.pdf]

## Supplementary Information

# Production of Nitrogen Doped Carbon Quantum Dots with Controllable Emission Wavelength, Excellent Sensing of Fe<sup>3+</sup> in Aqueous Solution and Potential Application for Stealth QR Coding at Visible Regime

*Yu-Hsun Su, Hsuan-Hao Huang, Chao-Chi Tseng, Hsin-Jung Tsai, Wen-Kuang Hsu\**

Department of Materials Science and Engineering & High Entropy Materials Center,

National Tsing-Hua University, Hsinchu 300044, Taiwan

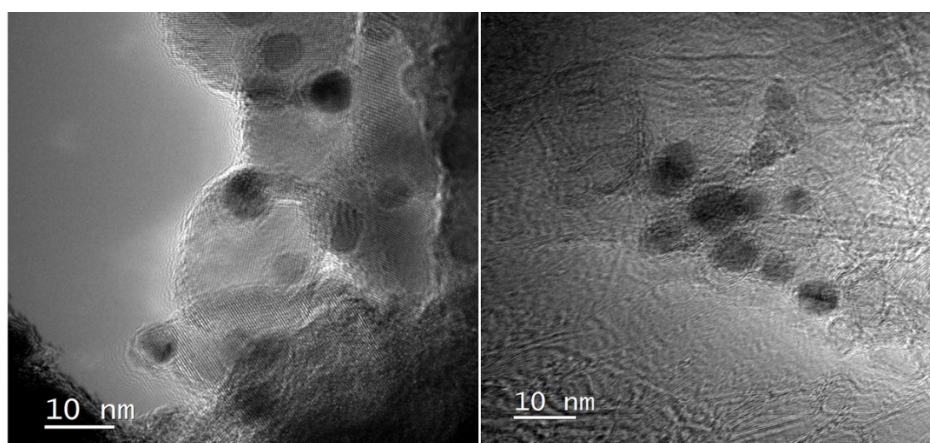

**Figure S1.** TEM images of ST3 made CQDs.

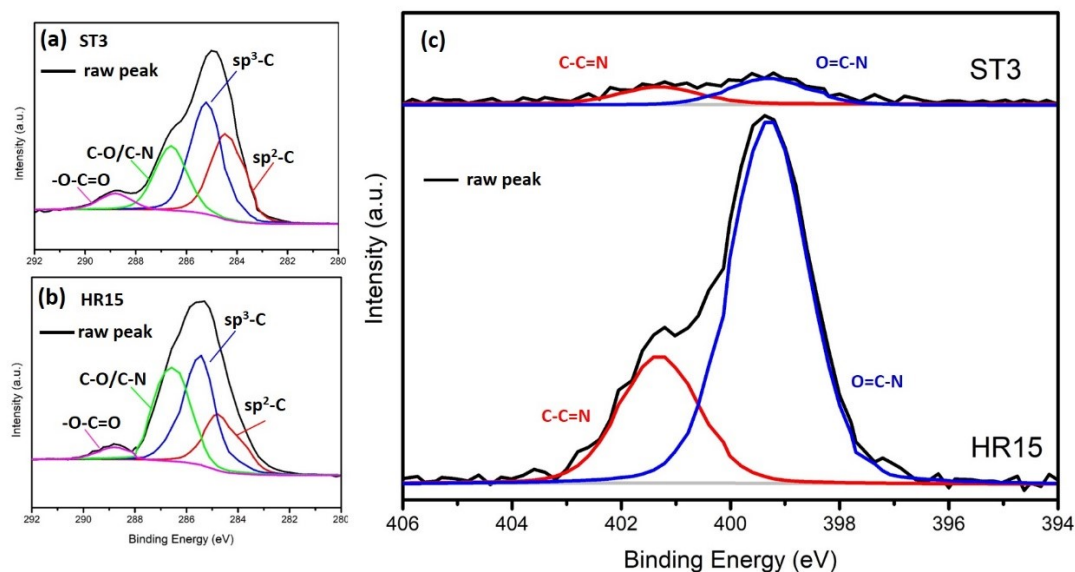

**Figure S2.** The surface functional groups of the N-CQDs were investigated using XPS spectra. The C1s high-resolution XPS spectrum of (a) ST3 and (b) HR15 shows three peaks assigned to carbon atoms in C=C (284.40 eV), C-C(285.2 eV), C-O (286.2 eV), and -O-C=O (288.8 eV). (c)The high-resolution N1s XPS spectrum (Figure 4C) exhibits two peaks located at 399.29 and 401.32 eV, which can be attributed to C=C-N and O=C-N, respectively.

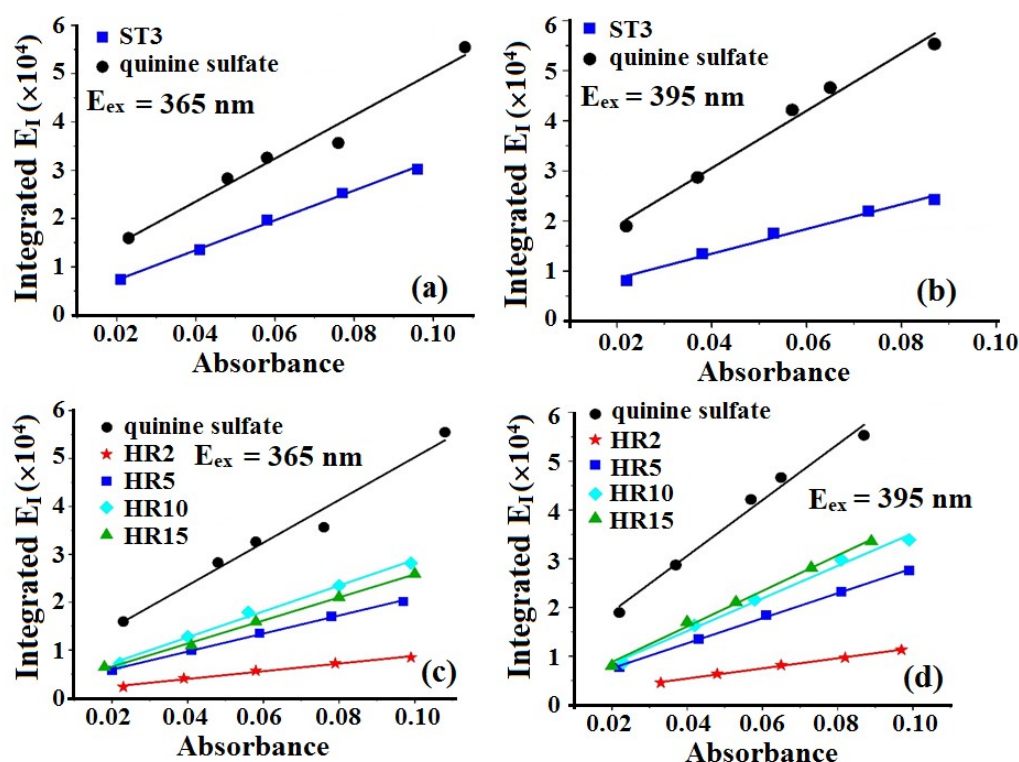

**Figure S3.** Integrated  $E_I$  - absorbance profiles of ST3 and quinine sulfate at  $E_{ex} = 365$  nm (a) and 395 nm (b). Integrated  $E_I$  - absorbance profiles of HR and quinine sulfate at  $E_{ex} = 365$  nm (c) and 395 nm (d).

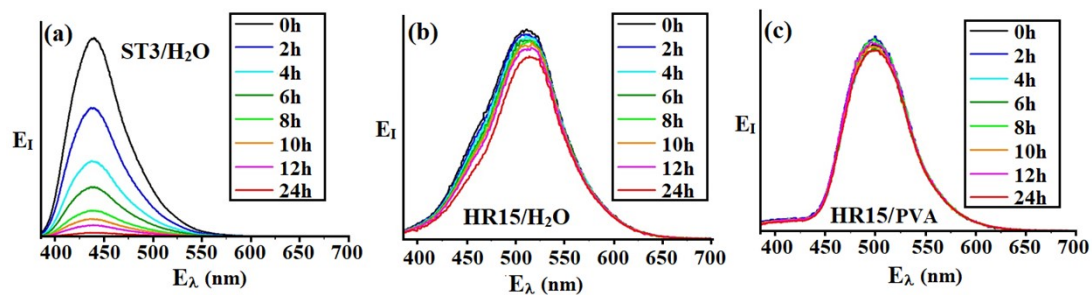

**Figure S4.**  $E_I$ - $E_\lambda$  plots of ST3/H<sub>2</sub>O (a), HR15/H<sub>2</sub>O (b) and HR15/PVA at different irradiation times (c).  $E_{ex} = 395$  nm.

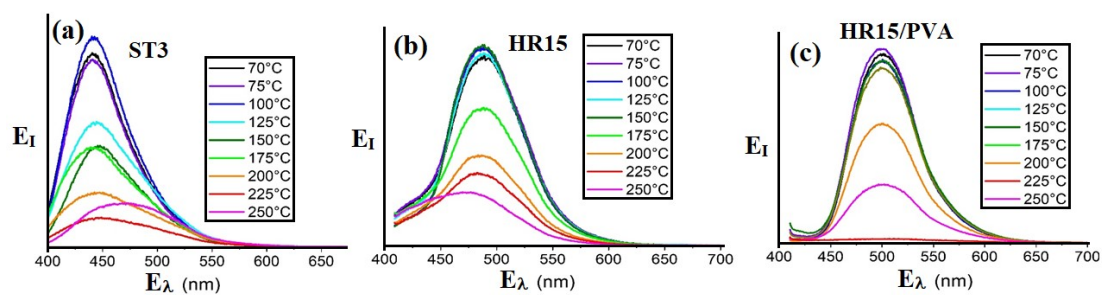

**Figure S5.**  $E_I$ - $E_\lambda$  plots of ST3 (a), HR15 (b) and HR15/PVA (c) at different temperatures.
